# Supplementary material for: Service Users and their Family Members’ Views of a Veterans’ Mental Health Service in the UK: A Qualitative Evaluation
Source: Research Square preprint supplement (doi:10.21203/rs.3.rs-7622266/v1), 2025-10-30
Supplement: Supplementary file 1 [file 6e74f1e1f440f5780c5de9b2.docx]

**Topic Guide for Significant Others**

**Introductory line before recording:** Thank you for agreeing to participate in this evaluation. Briefly, we are exploring the views of veterans, their significant others, and professionals involved in the care of veterans. I have about 10-12 questions, but I am mindful of your time. So, we will complete the interview in 25-30 minutes. Do you have any questions for me before we begin?

Alright, I may take notes in between to remind myself to come back to your points. The questions will be about your experience of being involved in the care of your significant veteran accessing the service. If you feel distressed at any point, we can pause or stop the interview, and I will signpost you to the duty clinician.

We will begin with a few questions about your background (share screen and write responses in your notebook. Once the demographic sheet is complete, stop sharing the screen.)

I will be audio recording the remaining part of the interview. Is that okay with you? (Start the recording)

**Before starting assessment/ treatment**

1. What is your **relationship** with the veteran?

- Are you involved in their care and the support they are receiving at Op Courage? Tell me about your role in their care and your involvement in their accessing Op Courage.

1. What do you think about the **referral process and initial contact** with London Op Courafe for your veteran?

- What could be improved in this initial referral process?

1. What do you think about the **initial information** you andyour veteran received before assessment and receiving treatment and support?

- What could be improved about that initial information?

**During assessment/treatment**

1. What **treatment or support** is being offered to your veteran at the London Op Courage service?

- How can Op Courage better provide information to the carers of Veterans accessing the service?
- What do you think about the treatment and support being offered to your veteran?

1. How does Op Courage **involve you** in the care plan of your veteran?

- How can Op Courage improve the involvement of you and other Veterans’ carers in the treatment and support for Veterans?
- How do you feel about your current level of involvement?

1. Have you been **receiving any support** from The Ripple Pond?

- If so, what do you think about the way you were referred to them?
- How could Op Courage improve the support for you and other carers like you? Are there any other services you would have wanted for you or any children you may have?

1. Were you referred to being supported by **Op Community**? If so, how did Op Courage support you to consult them?
2. Tell me about your experience with the **service staff** at Op Courage.

- What do you find most helpful about your own and your veteran’s interaction with the service staff?
- What could the service staff improve in their interaction with you and your veteran?

1. What kind of information should be available on the Op Courage **website**?

- If you have seen their website, what, if any, is the most helpful information available on it? What could be improved?
- How else would you like to receive information about the services available at Op Courage and for Veterans in London?

1. What **challenges** have you experienced in getting support for your veteran at Op Courage?

- How has the service supported you to overcome these challenges?
- How could the service better support you in managing these challenges?

1. If you were responsible for **designing services** to support Veterans and their carers, what would you want to do differently?
2. We would like to explore how significant others of veterans accessing Op Courage could be better involved in the service. Would you have any suggestions on how you and others like you could be **involved** in the Op Courage service?

- If you could, would you like to be involved as an advisor, or in groups run by the Op Courage service to support other significant others and veterans?

1. Is there anything else that you may like to add about your experience at Op Courage that I may not have asked you today?

(Stop the recording. Thank them. Check how they are feeling and if they need some support.

If they have chosen to receive a summary of findings in their consent form, inform them that you or one of your team members will send them the summary by June.)

**Topic Guide for Service Users**

**Introductory line before recording:** Thank you for agreeing to participate in this evaluation. Briefly, we are exploring the views of veterans, their significant others, and professionals involved in the care of veterans. I have about 10-12 questions, but I am mindful of your time. So, we will complete the interview in 25-30 minutes. Do you have any questions for me before we begin?

Alright, I may take notes in between to remind myself to come back to your points. The questions will be about your experience of using the service, not about your reasons for seeking support. If you feel distressed at any point, we can pause or stop the interview, and I will signpost you to the duty clinician.

We will begin with a few questions about your background (share screen and write responses in your notebook. Once the demographic sheet is complete, stop sharing the screen.)

I will be audio recording the remaining part of the interview. Is that okay with you? (Start the recording)

**Before assessment/treatment**

1. What was the process of **initially contacting** or being referred to the London Op Courage?
2. How do you feel about the **waiting time** at Op Courage for initial assessment?

- What contact, if any, was made by Op Courage in the waiting time for initial assessment?

1. Before you were assessed or your treatment was started, what do you think about the **information you received** about that assessment or treatment?

- What could be improved in the initial information and any forms completed?
- If they say that they already knew about the process from another organisation or service, ask: If you were to think about other veterans like you initially contacting the service, what information should they receive?

**During treatment:**

1. What are your **experiences of the treatment and support** you have received at London Op Courage?

- Which of the techniques or any part of treatment or support was most helpful?
- What could have been better?

1. Tell me about your **experience interacting with the service staff,** including clinicians and any other members of staff.

- What, if anything, has been most helpful in the interactions with the staff?
- What, if anything, could be improved in interacting with the service staff?

1. Among the service staff, were you seen by the **Walking with the Wounded or Stoll workers**? If yes:

- What, if anything, was not helpful or could have been better about this experience?

1. Were you referred to **Op Community, Op NOVA or Op Restore** (previously called Veterans’ Trauma Network)? If so, how did Op Courage support you to consult them?
2. In your opinion, how **accessible** is the London Op Courage?

- What could improve access to Op Courage for veterans?
- What could improve access to Op Courage for veterans from varied ethnic backgrounds, sexual preferences, races and genders?

1. What do you think about the **suitability** of London Op Courage for veterans?

- How veteran-sensitive are the service facilities, treatment and staff?

**After/ nearly completed treatment:**

1. What were the main **challenges** experienced by you in accessing or getting treatment/support at the London Op Courage?

- How were you supported or could you have been better supported by Op Courage?

1. Have you accessed any support services for your **friends and family** (eg. The Ripple Pond, Op Community)? If so:

- What did Op Courage do to facilitate this support?
- How could Op Courage help involve significant others in the care of veterans?

1. We would like to explore how veterans accessing Op Courage could be better involved in the service. Would you have any suggestions on how you and other veterans could be **involved** in the Op Courage service?
2. If you were responsible for **designing services** to support Veterans and their carers, what would you want to do differently?
3. Is there something else that you may like to add about your experience at the London Op Courage service that I may not have asked you today?

(Stop the recording. Thank them. Check how they are feeling and if they need some support.

If they have chosen to receive a summary of findings in their consent form, inform them that you or one of your team members will send them the summary by June.)
